# Supplementary material for: Deep learning-based facial image analysis in medical research: a systematic review protocol
Source: PubMed Central journal article supplement — BMJ Open. 2021 Nov 10;11(11):e047549. doi: 10.1136/bmjopen-2020-047549 (PMC8587597; doi:10.1136/bmjopen-2020-047549), 2021-11-10
Supplement: bmjopen-2020-047549.draft_revisions.pdf [file bmjopen-2020-047549.draft_revisions.pdf]

# BMJ Open

BMJ Open is committed to open peer review. As part of this commitment we make the peer review history of every article we publish publicly available.

When an article is published we post the peer reviewers' comments and the authors' responses online. We also post the versions of the paper that were used during peer review. These are the versions that the peer review comments apply to.

The versions of the paper that follow are the versions that were submitted during the peer review process. They are not the versions of record or the final published versions. They should not be cited or distributed as the published version of this manuscript.

BMJ Open is an open access journal and the full, final, typeset and author-corrected version of record of the manuscript is available on our site with no access controls, subscription charges or pay-per-view fees (<http://bmjopen.bmj.com>).

If you have any questions on BMJ Open's open peer review process please email [info.bmjopen@bmj.com](mailto:info.bmjopen@bmj.com)

# BMJ Open

## Deep Learning-Based Facial Image Analysis in Medical Research: A Systematic Review Protocol

|                               |                                                                                                                                                                                                                                                                                                                                                                                                                  |
|-------------------------------|------------------------------------------------------------------------------------------------------------------------------------------------------------------------------------------------------------------------------------------------------------------------------------------------------------------------------------------------------------------------------------------------------------------|
| Journal:                      | <i>BMJ Open</i>                                                                                                                                                                                                                                                                                                                                                                                                  |
| Manuscript ID                 | bmjopen-2020-047549                                                                                                                                                                                                                                                                                                                                                                                              |
| Article Type:                 | Protocol                                                                                                                                                                                                                                                                                                                                                                                                         |
| Date Submitted by the Author: | 01-Dec-2020                                                                                                                                                                                                                                                                                                                                                                                                      |
| Complete List of Authors:     | Su, Zhaohui; UT Health San Antonio, Center on Smart and Connected Health Technologies, Mays Cancer Center, School of Nursing<br>Liang, Bin; Chinese Academy of Medical Sciences and Peking Union Medical College<br>Shi, Feng; Shanghai United Imaging Intelligence<br>Gelfond, J; University of Texas Health Science Center at San Antonio, Epidemiology and Biostatistics<br>Wang, Jing; UT Health San Antonio |
| Keywords:                     | PUBLIC HEALTH, Information technology < BIOTECHNOLOGY & BIOINFORMATICS, Health informatics < BIOTECHNOLOGY & BIOINFORMATICS, Telemedicine < BIOTECHNOLOGY & BIOINFORMATICS, BIOTECHNOLOGY & BIOINFORMATICS                                                                                                                                                                                                       |
|                               |                                                                                                                                                                                                                                                                                                                                                                                                                  |

SCHOLARONE™  
Manuscripts

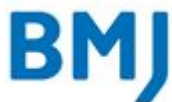

I, the Submitting Author has the right to grant and does grant on behalf of all authors of the Work (as defined in the below author licence), an exclusive licence and/or a non-exclusive licence for contributions from authors who are: i) UK Crown employees; ii) where BMJ has agreed a CC-BY licence shall apply, and/or iii) in accordance with the terms applicable for US Federal Government officers or employees acting as part of their official duties; on a worldwide, perpetual, irrevocable, royalty-free basis to BMJ Publishing Group Ltd ("BMJ") its licensees and where the relevant Journal is co-owned by BMJ to the co-owners of the Journal, to publish the Work in this journal and any other BMJ products and to exploit all rights, as set out in our [licence](#).

The Submitting Author accepts and understands that any supply made under these terms is made by BMJ to the Submitting Author unless you are acting as an employee on behalf of your employer or a postgraduate student of an affiliated institution which is paying any applicable article publishing charge ("APC") for Open Access articles. Where the Submitting Author wishes to make the Work available on an Open Access basis (and intends to pay the relevant APC), the terms of reuse of such Open Access shall be governed by a Creative Commons licence – details of these licences and which [Creative Commons](#) licence will apply to this Work are set out in our licence referred to above.

Other than as permitted in any relevant BMJ Author's Self Archiving Policies, I confirm this Work has not been accepted for publication elsewhere, is not being considered for publication elsewhere and does not duplicate material already published. I confirm all authors consent to publication of this Work and authorise the granting of this licence.

# Deep Learning-Based Facial Image Analysis in Medical Research: A Systematic Review Protocol

Zhaohui Su,<sup>1\*</sup> Bin Liang,<sup>2</sup> Feng Shi,<sup>3</sup> Jonathan Gelfond,<sup>4</sup> Jing Wang<sup>5</sup>

1. Ph.D., M.A., School of Nursing, Center on Smart and Connected Health Technologies, Mays Cancer Center, UT Health San Antonio, San Antonio, Texas, 78229, U.S.A.; [szh@utexas.edu](mailto:szh@utexas.edu)
2. Ph.D., M.D., Department of Radiation Oncology, National Cancer Center/National Clinical Research Center for Cancer/Cancer Hospital, Chinese Academy of Medical Sciences and Peking Union Medical College, Beijing, 10010, China; [leangbin@gmail.com](mailto:leangbin@gmail.com)
3. Ph.D., Department of Research and Development, Shanghai United Imaging Intelligence Co., Ltd., Shanghai 200232, China; [feng.shi@united-imaging.com](mailto:feng.shi@united-imaging.com)
4. M.D., Ph.D., Associate Professor, Department of Population Health Sciences, UT Health San Antonio, San Antonio, Texas, 78229, U.S.A.; [gelfondjal@uthscsa.edu](mailto:gelfondjal@uthscsa.edu)
5. Ph.D., M.P.H., R.N., FAAN, Professor, Vice Dean of Research, School of Nursing; Director, Center on Smart and Connected Health Technologies, UT Health San Antonio, San Antonio, Texas, 78229, U.S.A.; [wangj1@uthscsa.edu](mailto:wangj1@uthscsa.edu)

\*Corresponding author. 7703 Floyd Curl Drive, San Antonio, TX, 78229, U.S.A.; [szh@utexas.edu](mailto:szh@utexas.edu); ORCID ID: <https://orcid.org/0000-0003-2005-9504>

# Deep Learning-Based Facial Image Analysis in Medical Research: A Systematic Review Protocol

## Abstract

**Introduction:** Deep learning techniques are gaining momentum in medical research. Evidence shows that deep learning has advantages over humans in image identification and classification, such as facial image analysis in detecting people's medical conditions. While positive findings are available, little is known about patterns of utility of deep learning-based facial image analysis in the medical context. To address this gap, we aim to conduct a systematic review to identify the characteristics and effects of deep learning-based facial image analysis in medical research.

**Methods and analysis:** Databases including PubMed, PsycINFO, CINAHL, IEEEExplore, and Scopus will be searched for relevant studies published in English, using a search strategy that was developed in consultation with an academic librarian. Titles, abstracts, and full-text articles will be screened to identify eligible articles. A manual search of the reference lists of the included articles will also be conducted. The Preferred Reporting Items for Systematic Reviews and Meta-Analyses (PRISMA) framework was adopted to guide the systematic review process.

**Conclusions:** Insights gained from this systematic review will provide timely understanding of the characteristics, challenges, as well as opportunities in deep learning-based facial image analysis applied in the contexts of disease detection, diagnosis, and prognosis. In addition to gaining a connected and comprehensive understanding of the current application of facial image analysis, results of this review study will also be able to shed light on whether, similar to facial image analysis conducted in non-medical contexts, systematic bias and accuracy are present in medical research as well. Biased and inaccurate image analysis systems will not only exert unwarranted, though avoidable, disparities on patients (e.g., gender inequality), it may deprive some patients of potential benefits of deep-learning-based interventions for their health and wellbeing. Therefore, for the consideration of patients' welfare and the development of the practice, a timely understanding of the challenges and opportunities faced by research on deep-learning-based facial image analysis is needed.

**Ethics and dissemination:** NA

**Study Protocol Registration:** PROSPERO [CRD42020196473](https://www.crd.york.ac.uk/PROSPERO/record/CRD42020196473)

**Keywords:** facial image analysis; artificial intelligence; deep learning; convolutional neural network; abnormal facial expressions; facial analysis

### Strengths and limitations of this study

- Deep learning is a mechanism that allows computers to solve complex problems by neural network architecture.
- Deep learning techniques are gaining momentum in medical research.
- Evidence shows that deep learning has advantages over humans in image identification and classification, such as facial image analysis in detecting people's medical conditions.
- While positive findings are available, little is known about patterns of utility of deep learning-based facial image analysis in the medical context.
- This study aims to conduct a systematic review to identify the characteristics and effects of deep learning-based facial image analysis in medical research.

# A Systematic Review of Deep Learning-Based Facial Image Analysis in Medical Research: Insights and Implications

## Introduction

The application of artificial intelligence (AI) in healthcare is gaining momentum [1-3]. AI, especially machine learning and deep learning techniques, is invigorating medical research on various fronts, from developing and deploying consumer-facing telemedicine tools, such as ePAL, an AI-powered smartphone application for patients to manage cancer-related pain [4], to the application of AI techniques in disease diagnosis and prognosis, such as using AI to detect and grade cancer in prostate biopsy samples [5]. Machine learning is a subset of AI that could be understood as methods that allow computers to learn by mimicking how humans learn (i.e., process data and learn from it), without being explicitly programmed [6]. One emerging machine learning approach, deep learning, has found to be particularly helpful in addressing medical issues, given its accuracy in image identification and classification [3, 7]. Deep learning mimics the human brain by utilizing artificial neurons and layers (e.g., neural networks) [8].

While as presented in Figure 1, deep learning is a machine learning algorithm that allows computers to tackle complex problems via capitalizing on neural networks, such as convolutional neural networks (CNNs), that are rich in neurons, layers, and interconnectivity [9]. Simply put, deep learning is a mechanism that allows computers to solve complex problems by neural network architecture. This ability to develop complex network structures gives deep learning a distinctive advantage: it can automatically transform raw data input into meaningful features that enable pattern identification [3]. Deep learning technique has revolutionary potential in practical and research fields [10]. In practice, as deep learning effectively identifies objects, traffic signs,

1  
2  
3 and faces, its adaptations have been widely applied in designing robots and self-driving cars [11-  
4  
5 14]. Deep learning has also been widely adopted in biomedical and clinical research, particularly  
6  
7 in the field of medical imaging [15-18].  
8  
9

10  
11  
12 ---Insert Figure 1 here---  
13  
14  
15

16  
17 Medical conditions are often diagnosed by means of tests, such as measures like biopsy  
18  
19 and diagnostic imaging. As diagnostic imaging is noninvasive and can facilitate personalized  
20  
21 medicine, it is a preferred test option for patients and healthcare practitioners [19, 20]. This, in  
22  
23 turn, has contributed to the exponential growth of medical imaging data and the increasing need  
24  
25 for boosting medical image processing power to formulate diagnosis swiftly [20, 21]. Compared  
26  
27 to traditional computer aided diagnosis for analyzing medical imaging, such as hand-crafted  
28  
29 radiomics for tumor detection, deep learning methods are superior in their ability to process large  
30  
31 quantities of medical images accurately and cost-effectively, without exerting a heavy workload  
32  
33 on radiologists [22-26]. Evidence shows that deep learning-based medical image analysis was  
34  
35 able to increase accuracy rates in various disease contexts, such as the identification of spinal  
36  
37 disorder [27] and lung cancer histology [28], classification of skin lesion [29] and chronic  
38  
39 gastritis [30], and the prediction of tumor-related genes [31] and vascular diseases [32].  
40  
41  
42  
43

44  
45 As disease manifestations often show in various places in the human body, such as Down  
46  
47 Syndrome can change patients' facial features, researchers have been investigating whether  
48  
49 analyzing appearance features can facilitate early disease detection [1, 27, 33-35]. One promising  
50  
51 field is deep learning-based facial analysis [2, 36, 37]. Applying the deep learning technique to  
52  
53 perform facial recognition and analysis tasks, researchers found that the technique yielded  
54  
55  
56  
57  
58  
59  
60



1  
2  
3 superior results in identifying and classifying faces of people with cancer from those without [2].  
4  
5 Similarly, examining facial phenotypes of people with genetic disorders, findings indicate that  
6  
7 the technique was effective and was able to yield an optimal 91% top-10 accuracy [38].  
8  
9

10 Evidence further indicates that, for some tasks involving identifying and classifying facial  
11  
12 images, deep learning techniques have often performed on par or better than human beings [3,  
13  
14 35, 36, 39-41]. Comparing clinical and deep learning evaluations of microdeletion syndrome  
15  
16 facial phenotypes, researchers found that deep learning outperformed clinical evaluations in  
17  
18 terms of sensitivity and specificity by 96% [40]. These findings combined suggest that deep  
19  
20 learning-based facial analysis technology has great potential to address complex medical  
21  
22 challenges prevalent in healthcare. However, while useful insights are available, little is known  
23  
24 about the current development of deep learning-based facial analysis utilized across different  
25  
26 healthcare sectors. To date, no systematic review has investigated the state-of-the-art application  
27  
28 of deep learning-based facial analysis in addressing medical issues. Therefore, to bridge this gap,  
29  
30 we aim to systematically review the literature and present the characteristics and effects of deep  
31  
32 learning-based facial analysis techniques applied in medical research.  
33  
34  
35  
36  
37  
38  
39

### 40 **Methods and analysis**

41  
42 This systematic review was registered with the International Prospective Register of  
43  
44 Systematic Reviews database or PROSPERO ([CRD42020196473](https://www.crd42020196473)) *a priori* to improve research  
45  
46 rigor [42, 43]. The Principles of the Preferred Reporting Items for Meta-Analysis protocol  
47  
48 (PRISMA) was adopted to guide this systematic review [44]. Our search strategy incorporated  
49  
50 medical subject heading (MeSH) and keyword terms for the concept of deep learning and facial  
51  
52 analysis. The search strategy was developed in consultation with an academic librarian, and  
53  
54  
55  
56  
57  
58  
59

1  
2  
3 subsequently will be deployed to target databases, including PubMed, PsycINFO, CINAHL,  
4 IEEEExplore, and Scopus (Table 1). The search will be initiated in September, 2020. Studies will  
5  
6 be limited to journal articles published in English. We will adopt two additional search  
7  
8 mechanisms to locate eligible articles: (1) a manual search of the reference list of the included  
9  
10 articles will be performed, and (2) a reverse search of papers that cited articles included in the  
11  
12 final review via Google Scholar. An academic librarian will facilitate the search process, helping  
13  
14 administer the search and download the citation records to Rayyan (<http://rayyan.qcri.org>).  
15  
16  
17  
18  
19  
20  
21

22 ---Insert Table 1 here---

### 23 24 25 26 **Inclusion and exclusion criteria**

27  
28 The inclusion criteria were developed *a priori* and listed in Table 2. Studies will be  
29  
30 excluded articles if they: (1) did not report findings on human beings (e.g., studies on mice), (2)  
31  
32 did not focus on full facial features (e.g., research on retina or lip-cleft), (3) did not conduct  
33  
34 research in a medical context (e.g., in the context of criminology), and (4) did not report  
35  
36 empirical findings (e.g., editorial or comment papers).  
37  
38  
39  
40  
41  
42  
43  
44  
45  
46

47 ---Insert Table 2 here---

### 48 49 50 **Risk of bias assessment**

51  
52 To ensure quality of included studies, a risk of bias assessment will be conducted  
53  
54 independently by two reviewers, using the Cochrane Collaboration evaluation framework [45].  
55  
56 The framework has seven domains: (1) random sequence generation, (2) allocation concealment,  
57  
58  
59  
60

1  
2  
3 (3) blinding of participants and personnel, (4) blinding of outcome assessment, (5) incomplete  
4 outcome data, (6) selective reporting, and (7) any other source of bias. The risk of bias will be  
5  
6 evaluated independently by two reviewers. Potential discrepancies regarding the risk of bias will  
7  
8 be resolved via group discussions till a consensus is reached.  
9  
10

### 11 12 13 14 **Data Extraction**

15  
16  
17 Two reviewers will independently examine the citations and select studies for inclusion.  
18  
19 Discrepancies will be resolved by group discussions till a consensus is reached. Data will be  
20  
21 extracted based on research purpose and selection criteria adopted in this study. For articles that  
22  
23 meet the inclusion criteria, the reviewers will extract the following information from the included  
24  
25 papers: research purpose/questions, disease context, sample characteristics (e.g., characteristics  
26  
27 of facial records), AI characteristics (e.g., algorithm adopted), and empirical findings.  
28  
29  
30  
31  
32

### 33 **Data synthesis and analysis**

34  
35 If eligible studies share enough similarities to be pooled, a meta-analysis will be  
36  
37 conducted to gain further insights of the data. Main clinical, methodological, as well as statistical  
38  
39 variances will be carefully considered to determine heterogeneity of the eligible studies. If  
40  
41 eligible studies are found heterogeneous, a narrative synthesis will be conducted to summarize  
42  
43 the data. A summary of the data extracted will be organized to synthesize key results. Both tables  
44  
45 and graphs will be used to represent key characteristics of eligible articles. Descriptive analysis  
46  
47 will be performed on categorical variables.  
48  
49  
50  
51  
52  
53  
54  
55  
56  
57  
58  
59  
60

## Discussion

Though a growing body of research has applied deep learning-based facial image analysis in the medical context for disease detection, diagnosis, and prognosis, to date, no systematic review has investigated the state-of-the-art application of deep learning-based facial image analysis recognition in addressing medical diagnoses and clinical states. Therefore, to bridge this gap, we aim to systematically review the literature and present the characteristics, challenges, as well as opportunities in deep learning-based facial analysis techniques applied in medical research. To better organize the research findings, we developed a framework that illustrates the main causes for abnormal facial expressions in patients. It is important to note that we are identifying medical states and conditions and not individuals.

After reviewing the literature [46-61], we identified the following four preliminary categories of causes for short-term or long-term abnormal facial expressions in people: (1) gene-related factors, (2) neurological factors, (3) psychiatric conditions, and (4) medication-induced triggers. Genetic-related factors, such as the presence or mutation of a certain gene, are the most studied cause for abnormal facial changes in individuals [35, 36, 40]. Down syndrome, which is affected by the presence of a third copy of chromosome 21, is an example of genetic-related factors that can cause individuals' abnormal facial changes [35]. Neurological factors can also cause individuals' facial phenotypes. Stroke or transient ischemic attack is an example of neurological factors, which can occur either prior to or after the onset of the disease [62, 63]. The third cause for abnormal facial changes centers on individuals' psychiatric conditions or mental illnesses, especially psychotic disorders such as the Tourette syndrome (facial tics). Last but not the least, medication-induced triggers, such as the Neuroleptic malignant syndrome (caused by antipsychotic medications), can also cause abnormal facial changes in people. Details of this

1  
2  
3 framework can be found in Table 3. This framework will be used in the planned systematic  
4  
5 review study to guide data extract process.  
6  
7  
8  
9

10 ---Insert Table 3 here---

11  
12  
13  
14 Overall, insights gained from this study will be able to provide much-needed timely  
15 understanding of the characteristics, challenges, as well as opportunities in the context of deep  
16 learning-based facial image analysis technologies applied in disease detection, diagnosis, and  
17 prognosis. In addition to gaining a connected and comprehensive understanding of current  
18 application of facial image analysis, results of the current study will also be able to shed light on  
19 whether, similar to facial recognition used in non-medical [64, 65] and medical contexts [66, 67],  
20 whether or to what degree is systematic bias is present in the application of deep learning  
21 technologies for facial image analysis. A biased and inaccurate facial image analysis system will  
22 not only exert unwarranted, though avoidable, disparities on patients (e.g., gender inequality)  
23 [66], it will also alienate the patients from the much-needed deep-learning-assisted medical  
24 opportunities their health and wellbeing can benefit from [68]. Therefore, for the consideration  
25 of patients' welfare and the development of the clinical practice, a timely understanding of the  
26 scope of the research literature as well as the challenges and opportunities faced by research on  
27 deep-learning-based facial image analysis is much needed.  
28  
29  
30  
31  
32  
33  
34  
35  
36  
37  
38  
39  
40  
41  
42  
43  
44  
45  
46  
47  
48  
49  
50

## 51 **Abbreviations**

52  
53  
54 AI: Artificial intelligence  
55  
56  
57  
58  
59  
60

1  
2  
3  
4 **Ethics and dissemination**  
5

- 6           ○ Not applicable.  
7

8 **Authors' contributions**  
9

- 10           ○ ZS developed the research idea and drafted the manuscript. BL, FS, and JG, and JW  
11 reviewed and revised the manuscript.  
12  
13  
14

15 **Funding statement**  
16

- 17           ○ None.  
18

19 **Competing interests**  
20

- 21           ○ None.  
22  
23

24 **Acknowledgements**  
25

- 26           ○ The authors wish to thank Emme Lopez, for her assistance in the search strategy  
27 development. Furthermore, the authors are very grateful for the constructive input  
28 offered by the editors and reviewers.  
29  
30

31 **Word count:**  
32

- 33           ○ 2,228  
34  
35  
36  
37  
38  
39  
40  
41  
42  
43  
44  
45  
46  
47  
48  
49  
50  
51  
52  
53  
54  
55  
56  
57  
58  
59  
60

**Reference:**

1. Wang, X., et al., *Artificial intelligence in tongue diagnosis: Using deep convolutional neural network for recognizing unhealthy tongue with tooth-mark*. Computational and structural biotechnology journal, 2020. **18**: p. 973-980.
2. Liang, B., et al., *Identification of the facial features of patients with cancer: A deep learning-based pilot study*. J Med Internet Res, 2020. **22**(4): p. e17234.
3. LeCun, Y., Y. Bengio, and G. Hinton, *Deep learning*. Nature, 2015. **521**(7553): p. 436-444.
4. Kamdar, M.M., et al., *A randomized controlled trial of a novel artificial-intelligence based smartphone application to optimize the management of cancer-related pain*. Journal of Clinical Oncology, 2018. **36**(34\_suppl): p. 76-76.
5. Ström, P., et al., *Artificial intelligence for diagnosis and grading of prostate cancer in biopsies: A population-based, diagnostic study*. The Lancet Oncology, 2020. **21**(2): p. 222-232.
6. Samuel, A.L., *Some studies in machine learning using the game of checkers*. IBM Journal of Research and Development, 1959. **3**(3): p. 210-229.
7. Komura, D. and S. Ishikawa, *Machine learning methods for histopathological image analysis*. Computational and structural biotechnology journal, 2018. **16**: p. 34-42.
8. Mitchell, T.M., *Machine Learning* International ed. 1997, New York, NY: McGraw-Hill.
9. Deng, L. and D. Yu, *Deep learning: Methods and applications*. Foundations and Trends in Signal Processing, 2014. **7**(3-4): p. 197-387.

10. Gilani, S.Z. and A. Mian. *Learning from millions of 3D scans for large-scale 3D face recognition*. in *2018 IEEE/CVF Conference on Computer Vision and Pattern Recognition*. 2018.
11. Algabri, R. and M.-T. Choi, *Deep-learning-based indoor human following of mobile robot using color feature*. *Sensors*, 2020. **20**(9).
12. Yin, J., et al., *Table cleaning task by human support robot using deep learning technique*. *Sensors (Basel, Switzerland)*, 2020. **20**(6): p. 1698.
13. Balado, J., et al., *Road environment semantic segmentation with deep learning from MLS point cloud data*. *Sensors*, 2019. **19**(16): p. 3466.
14. Naqvi, R.A., et al., *Deep learning-based gaze detection system for automobile drivers using a NIR camera sensor*. *Sensors (Basel, Switzerland)*, 2018. **18**(2): p. 456.
15. Liu, G., et al., *Automatic classification of esophageal lesions in endoscopic images using a convolutional neural network*. *Annals of translational medicine*, 2020. **8**(7): p. 486-486.
16. Chartrand, G., et al., *Deep learning: A primer for radiologists*. *RadioGraphics*, 2017. **37**(7): p. 2113-2131.
17. Jeong, Y., et al., *Deep learning-based decision support system for the diagnosis of neoplastic gallbladder polyps on ultrasonography: Preliminary results*. *Scientific Reports*, 2020. **10**(1): p. 7700.
18. Sánchez Fernández, I., et al., *Deep learning in rare disease. Detection of tubers in tuberous sclerosis complex*. *PLoS ONE*, 2020. **15**(4): p. e0232376-e0232376.
19. Marro, A., T. Bandukwala, and W. Mak, *Three-dimensional printing and medical imaging: A review of the methods and applications*. *Current Problems in Diagnostic Radiology*, 2016. **45**(1): p. 2-9.



- 1  
2  
3 20. Atutornu, J. and C.M. Hayre, *Personalised medicine and medical imaging: Opportunities*  
4 *and challenges for contemporary health care*. Journal of Medical Imaging and Radiation  
5 *Sciences*, 2018. **49**(4): p. 352-359.  
6  
7  
8  
9  
10 21. Afshar, P., et al., *From handcrafted to deep-learning-based cancer radiomics:*  
11 *Challenges and opportunities*. IEEE Signal Processing Magazine, 2019. **36**(4): p. 132-  
12 160.  
13  
14  
15  
16 22. Antropova, N., B.Q. Huynh, and M.L. Giger, *A deep feature fusion methodology for*  
17 *breast cancer diagnosis demonstrated on three imaging modality datasets*. Medical  
18 *Physics*, 2017. **44**(10): p. 5162-5171.  
19  
20  
21  
22  
23 23. Giger, M.L., *Machine learning in medical imaging*. Journal of the American College of  
24 *Radiology*, 2018. **15**(3, Part B): p. 512-520.  
25  
26  
27  
28 24. Sahiner, B., et al., *Deep learning in medical imaging and radiation therapy*. Medical  
29 *Physics*, 2019. **46**(1): p. e1-e36.  
30  
31  
32  
33 25. Huang, S., et al., *Artificial intelligence in cancer diagnosis and prognosis: Opportunities*  
34 *and challenges*. Cancer Letters, 2020. **471**: p. 61-71.  
35  
36  
37  
38 26. Litjens, G., et al., *Deep learning as a tool for increased accuracy and efficiency of*  
39 *histopathological diagnosis*. Scientific Reports, 2016. **6**(1): p. 26286.  
40  
41  
42  
43 27. Yang, J., et al., *Development and validation of deep learning algorithms for scoliosis*  
44 *screening using back images*. Communications Biology, 2019. **2**(1): p. 390.  
45  
46  
47 28. Moitra, D. and R.K. Mandal, *Prediction of non-small cell lung cancer histology by a*  
48 *deep ensemble of convolutional and bidirectional recurrent neural network*. Journal of  
49 *Digital Imaging*, 2020.  
50  
51  
52  
53  
54  
55  
56  
57  
58  
59  
60

- 1  
2  
3 29. Mahbod, A., et al., *Transfer learning using a multi-scale and multi-network ensemble for*  
4 *skin lesion classification*. Computer Methods and Programs in Biomedicine, 2020. **193**:  
5 p. 105475.  
6  
7  
8  
9  
10 30. Li, Z., et al., *Chronic gastritis classification using gastric X-ray images with a semi-*  
11 *supervised learning method based on tri-training*. Medical & Biological Engineering &  
12 Computing, 2020. **58**(6): p. 1239-1250.  
13  
14  
15  
16  
17 31. Liu, S., et al., *Isocitrate dehydrogenase (IDH) status prediction in histopathology images*  
18 *of gliomas using deep learning*. Scientific reports, 2020. **10**(1): p. 7733-7733.  
19  
20  
21 32. Kim, Y.D., et al., *Effects of hypertension, diabetes, and smoking on age and sex*  
22 *prediction from retinal fundus images*. Scientific Reports, 2020. **10**(1): p. 4623.  
23  
24  
25  
26 33. Lam, C., et al., *Automated detection of diabetic retinopathy using deep learning*. AMIA  
27 Joint Summits on Translational Science proceedings. AMIA Joint Summits on  
28 Translational Science, 2018. **2017**: p. 147-155.  
29  
30  
31  
32  
33 34. Martin, D., et al., *Systematic review and meta-analysis of the relationship between*  
34 *genetic risk for schizophrenia and facial emotion recognition*. Schizophrenia Research,  
35 2020.  
36  
37  
38  
39  
40 35. Kruszka, P., et al., *Down syndrome in diverse populations*. American Journal of Medical  
41 Genetics Part A, 2017. **173**(1): p. 42-53.  
42  
43  
44  
45 36. Latorre-Pellicer, A., et al., *Evaluating Face2Gene as a tool to identify Cornelia de Lange*  
46 *syndrome by facial phenotypes*. International Journal of Molecular Sciences, 2020. **21**(3).  
47  
48  
49 37. Myers, L., et al., *Clinical versus automated assessments of morphological variants in*  
50 *twins with and without neurodevelopmental disorders*. American Journal of Medical  
51 Genetics Part A, 2020. **182**(5): p. 1177-1189.  
52  
53  
54  
55  
56  
57  
58  
59  
60

- 1  
2  
3 38. Gurovich, Y., et al., *Identifying facial phenotypes of genetic disorders using deep*  
4  
5 *learning*. Nature Medicine, 2019. **25**(1): p. 60-64.  
6  
7  
8 39. Wang, Y. and M. Kosinski, *Deep neural networks are more accurate than humans at*  
9  
10 *detecting sexual orientation from facial images*. Journal of Personality and Social  
11  
12 Psychology, 2018. **114**(2): p. 246-257.  
13  
14  
15 40. Kruszka, P., et al., *22q11.2 deletion syndrome in diverse populations*. American journal  
16  
17 of medical genetics. Part A, 2017. **173**(4): p. 879-888.  
18  
19  
20 41. Elmas, M. and B. Gogus, *Success of face analysis technology in rare genetic diseases*  
21  
22 *diagnosed by whole-exome sequencing: A single-center experience*. Molecular  
23  
24 Syndromology, 2020. **11**(1): p. 4-14.  
25  
26  
27 42. Xu, C., et al., *Protocol registration or development may benefit the design, conduct and*  
28  
29 *reporting of dose-response meta-analysis: Empirical evidence from a literature survey*.  
30  
31 BMC Medical Research Methodology, 2019. **19**(1): p. 78.  
32  
33  
34 43. dos Santos, M.B.F., et al., *Protocol registration improves reporting quality of systematic*  
35  
36 *reviews in dentistry*. BMC Medical Research Methodology, 2020. **20**(1): p. 57.  
37  
38  
39 44. Moher, D., et al., *Preferred reporting items for systematic review and meta-analysis*  
40  
41 *protocols (PRISMA-P) 2015 statement*. Systematic Reviews, 2015. **4**(1): p. 1-1.  
42  
43  
44 45. Higgins, J.P., et al., *Cochrane handbook for systematic reviews of interventions*. 2019:  
45  
46 John Wiley & Sons.  
47  
48  
49 46. Kruszka, P., et al., *Down syndrome in diverse populations*. Am J Med Genet A, 2017.  
50  
51 **173**(1): p. 42-53.  
52  
53  
54 47. Basel-Vanagaite, L., et al., *Recognition of the Cornelia de Lange syndrome phenotype*  
55  
56 *with facial dysmorphology novel analysis*. Clinical Genetics, 2016. **89**(5): p. 557-563.  
57  
58  
59  
60

- 1  
2  
3 48. Cha, S., et al., *Identification of five novel genetic loci related to facial morphology by*  
4 *genome-wide association studies*. BMC Genomics, 2018. **19**(1): p. 481.  
5  
6  
7  
8 49. Richmond, S., et al., *Facial genetics: A brief overview*. Frontiers in Genetics, 2018.  
9  
10 **9**(462).  
11  
12 50. Spencer, C.R. and R.M. Irving, *Causes and management of facial nerve palsy*. British  
13 Journal of Hospital Medicine, 2016. **77**(12): p. 686-691.  
14  
15 51. Fasano, A. and M. Tinazzi, *Functional facial and tongue movement disorders*, in  
16 *Handbook of Clinical Neurology*, M. Hallett, J. Stone, and A. Carson, Editors. 2016,  
17 Elsevier. p. 353-365.  
18  
19 52. Hagberg, B., *Clinical manifestations and stages of rett syndrome*. Mental Retardation and  
20 Developmental Disabilities Research Reviews, 2002. **8**(2): p. 61-65.  
21  
22 53. Tan, N.C., L.L. Chan, and E.K. Tan, *Hemifacial spasm and involuntary facial*  
23 *movements*. QJM: An International Journal of Medicine, 2002. **95**(8): p. 493-500.  
24  
25 54. Liu, T.-L., et al., *Association between facial emotion recognition and bullying*  
26 *involvement among adolescents with high-functioning autism spectrum disorder*.  
27 International Journal of Environmental Research and Public Health, 2019. **16**(24): p.  
28 5125.  
29  
30 55. Boutrus, M., et al., *Increased facial asymmetry in autism spectrum conditions is*  
31 *associated with symptom presentation*. Autism Research, 2019. **12**(12): p. 1774-1783.  
32  
33 56. Gill, C.E. and K. Kompolti, *Clinical Features of Tourette Syndrome*. Journal of Child  
34 Neurology, 2019. **35**(2): p. 166-174.  
35  
36 57. Kim, D.D., et al., *Antipsychotic-associated symptoms of Tourette syndrome: A systematic*  
37 *review*. CNS Drugs, 2018. **32**(10): p. 917-938.  
38  
39  
40  
41  
42  
43  
44  
45  
46  
47  
48  
49  
50  
51  
52  
53  
54  
55  
56  
57  
58  
59  
60

- 1  
2  
3 58. Thomas, C.S., *A study of facial dysmorphophobia*. Psychiatric Bulletin, 1995. **19**(12): p.  
4 736-739.  
5  
6  
7  
8 59. Phillips, K.A., T.F. Cash, and L. Smolak, *Body image and body dysmorphic disorder*.  
9 Eating Disorders and Obesity: A Comprehensive Handbook, 2002. **2**: p. 115.  
10  
11  
12 60. Reese, H.E., R.J. McNally, and S. Wilhelm, *Facial asymmetry detection in patients with*  
13 *body dysmorphic disorder*. Behaviour Research and Therapy, 2010. **48**(9): p. 936-940.  
14  
15  
16  
17 61. White, Janson J., et al., *DVL3 alleles resulting in a -1 frameshift of the last exon mediate*  
18 *autosomal-dominant Robinow syndrome*. The American Journal of Human Genetics,  
19 2016. **98**(3): p. 553-561.  
20  
21  
22  
23  
24 62. Onder, H., L. Albayrak, and H. Polat, *Frontal lobe ischemic stroke presenting with*  
25 *peripheral type facial palsy: A crucial diagnostic challenge in emergency practice*.  
26 Turkish Journal of Emergency Medicine, 2017. **17**(3): p. 112-114.  
27  
28  
29  
30  
31 63. Han, Y.-y., et al., *Limb-shaking transient ischemic attack with facial muscles involuntary*  
32 *twitch successfully treated with internal carotid artery stenting*. Brain and Behavior,  
33 2020. **n/a**(n/a): p. e01679.  
34  
35  
36  
37  
38 64. Buolamwini, J. and T. Gebru, *Gender shades: Intersectional accuracy disparities in*  
39 *commercial gender classification*, in *Proceedings of the 1st Conference on Fairness,*  
40 *Accountability and Transparency*, A.F. Sorelle and W. Christo, Editors. 2018, PMLR:  
41 Proceedings of Machine Learning Research. p. 77--91.  
42  
43  
44  
45  
46  
47 65. Drozdowski, P., et al., *Demographic bias in biometrics: A survey on an emerging*  
48 *challenge*. IEEE Transactions on Technology and Society, 2020. **1**(2): p. 89-103.  
49  
50  
51  
52 66. Parikh, R.B., S. Teeple, and A.S. Navathe, *Addressing bias in artificial intelligence in*  
53 *health care*. JAMA, 2019. **322**(24): p. 2377-2378.  
54  
55  
56  
57  
58  
59  
60

- 1  
2  
3 67. Obermeyer, Z., et al., *Dissecting racial bias in an algorithm used to manage the health of*  
4 *populations*. Science, 2019. **366**(6464): p. 447.  
5  
6  
7  
8 68. Garcia, R.V., et al. *The harms of demographic bias in feep face recognition research*. in  
9 *2019 International Conference on Biometrics (ICB)*. 2019.  
10  
11  
12  
13  
14  
15  
16  
17  
18  
19  
20  
21  
22  
23  
24  
25  
26  
27  
28  
29  
30  
31  
32  
33  
34  
35  
36  
37  
38  
39  
40  
41  
42  
43  
44  
45  
46  
47  
48  
49  
50  
51  
52  
53  
54  
55  
56  
57  
58  
59  
60

**Table 1.** Example PubMed search strategy

| Concept               | Search string                                                                                                                                                                                                                                                                                                                                                                                        |
|-----------------------|------------------------------------------------------------------------------------------------------------------------------------------------------------------------------------------------------------------------------------------------------------------------------------------------------------------------------------------------------------------------------------------------------|
| Deep learning         | “deep learning”[MeSH] OR “deep learning”[TIAB] OR “artificial intelligence” [MeSH] OR “artificial intelligence” [TIAB] OR “machine learning”[MeSH] OR “machine learning”[TIAB] OR “convolutional neural network”[MeSH] OR “convolutional neural network”[TIAB] OR “convolutional neural networks”[TIAB]                                                                                              |
| Facial image analysis | “face detect*” OR “facial detect*” OR “face recogn*” OR “facial recogn*” OR “face extract*” or “facial extract*” OR “face analys*” OR “facial analys*” OR “face dysmorphology” OR “facial dysmorphology” OR “face phenotype*” OR “facial phenotype*” OR “face feature*” OR “facial feature*” OR “face2gene” OR “gestalt theory” OR “face photograph*” OR “facial photograph*” OR “facial expression” |

**Table 2.** Study inclusion criteria

| <b>Data type</b>     | <b>Inclusion criteria</b>                                                                                                                                                                      |
|----------------------|------------------------------------------------------------------------------------------------------------------------------------------------------------------------------------------------|
| Participants         | Individuals younger or older than 18 years old                                                                                                                                                 |
| Research context     | Medical research or healthcare                                                                                                                                                                 |
| Analytical technique | Deep learning algorithms-based facial image analysis                                                                                                                                           |
| Language             | English                                                                                                                                                                                        |
| Study type           | Quantitative empirical study                                                                                                                                                                   |
| Outcome              | Report empirical and original findings on the application of deep learning-based facial image analysis in medical context (e.g., accuracy of facial image analysis in detecting Down syndrome) |



**Table 3.** Main causes for abnormal facial expressions

| Cause                       | Definition and Example                                                                                                                                                                                                                                                                                                                                                                                                                                                                                                                                                                                                                                                                 |
|-----------------------------|----------------------------------------------------------------------------------------------------------------------------------------------------------------------------------------------------------------------------------------------------------------------------------------------------------------------------------------------------------------------------------------------------------------------------------------------------------------------------------------------------------------------------------------------------------------------------------------------------------------------------------------------------------------------------------------|
| Gene-related factors        | <p>Gene-related factors are causes for individuals' abnormal facial changes that root in the presence or mutation of one or a set of genes.</p> <p><b>Examples:</b> Down syndrome (genetic root: presence of a third copy of chromosome 21) or Cornelia de Lange syndrome (genetic root: NIPBL or <i>SMC1A</i>, <i>SMC3</i>, <i>RAD21</i> or <i>HDAC8</i>, <i>BRD4</i> and <i>ANKRD11</i> genes) [46-48, 61].</p>                                                                                                                                                                                                                                                                      |
| Neurological factors        | <p>Neurological factors are defined as reasons that are associated with individuals' congenital or acquired disorders of nerves and the nervous system. Neurological factors can either be related to genetic or non-genetic factors, caused by irregularity in nerves associated with the brain or the face.</p> <p><b>Examples:</b> Neurological factors with genetic causes (e.g., Rett syndrome, <i>MECP2</i> gene; Cervical or Cranial dystonia, <i>GNAL</i> gene) and without (e.g., embouchure dystonia, Oromandibular dystonia) [52, 53]; due to nerves associated with the brain (e.g., stroke) or the face (Bell's palsy or facial paralysis, Hemifacial Spasm) [49-51].</p> |
| Psychiatric conditions      | <p>Psychiatric conditions, especially psychotic disorders, have the potential to cause abnormal facial expressions among individuals. Psychiatric conditions could be broadly defined as mental illnesses, whereas psychotic disorder factors are causes to abnormal facial expressions that root in individuals' impaired sense of reality.</p> <p><b>Examples:</b> Non-drug-related Tourette syndrome (facial tics) or Autism (facial expression limitation) [54-56].</p>                                                                                                                                                                                                            |
| Medication-induced triggers | <p>Medication-induced triggers could be understood as causes to individuals' short-term or long-term abnormal facial changes due to their adverse reactions to a certain medication of a type of medications.</p> <p><b>Examples:</b> Neuroleptic malignant syndrome (antipsychotic drugs), Tardive dyskinesia (antipsychotic medications), or drug-related Tourette syndrome [57-60].</p>                                                                                                                                                                                                                                                                                             |

**Figure 1.** Relationship between artificial intelligence, machine learning, deep learning, and convolutional neural networks.

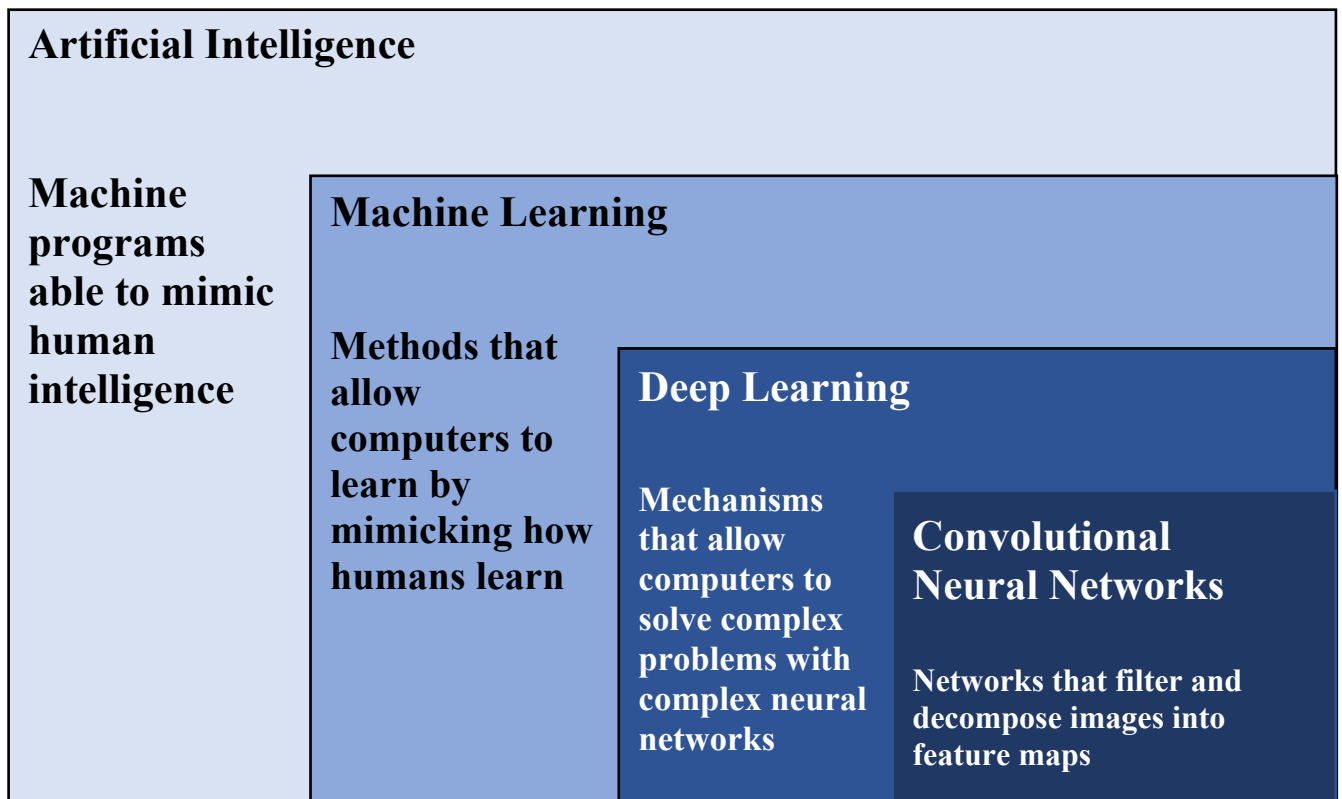

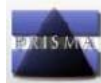

# PRISMA 2009 Checklist

| Section/topic                      | #  | Checklist item                                                                                                                                                                                                                                                                                              | Reported on page # |
|------------------------------------|----|-------------------------------------------------------------------------------------------------------------------------------------------------------------------------------------------------------------------------------------------------------------------------------------------------------------|--------------------|
| <b>TITLE</b>                       |    |                                                                                                                                                                                                                                                                                                             |                    |
| Title                              | 1  | Identify the report as a systematic review, meta-analysis, or both.                                                                                                                                                                                                                                         | ✓                  |
| <b>ABSTRACT</b>                    |    |                                                                                                                                                                                                                                                                                                             |                    |
| Structured summary                 | 2  | Provide a structured summary including, as applicable: background; objectives; data sources; study eligibility criteria, participants, and interventions; study appraisal and synthesis methods; results; limitations; conclusions and implications of key findings; systematic review registration number. | ✓                  |
| <b>INTRODUCTION</b>                |    |                                                                                                                                                                                                                                                                                                             |                    |
| Rationale                          | 3  | Describe the rationale for the review in the context of what is already known.                                                                                                                                                                                                                              | ✓                  |
| Objectives                         | 4  | Provide an explicit statement of questions being addressed with reference to participants, interventions, comparisons, outcomes, and study design (PICOS).                                                                                                                                                  | ✓                  |
| <b>METHODS</b>                     |    |                                                                                                                                                                                                                                                                                                             |                    |
| Protocol and registration          | 5  | Indicate if a review protocol exists, if and where it can be accessed (e.g., Web address), and, if available, provide registration information including registration number.                                                                                                                               | ✓                  |
| Eligibility criteria               | 6  | Specify study characteristics (e.g., PICOS, length of follow-up) and report characteristics (e.g., years considered, language, publication status) used as criteria for eligibility, giving rationale.                                                                                                      | ✓                  |
| Information sources                | 7  | Describe all information sources (e.g., databases with dates of coverage, contact with study authors to identify additional studies) in the search and date last searched.                                                                                                                                  | ✓                  |
| Search                             | 8  | Present full electronic search strategy for at least one database, including any limits used, such that it could be repeated.                                                                                                                                                                               | ✓                  |
| Study selection                    | 9  | State the process for selecting studies (i.e., screening, eligibility, included in systematic review, and, if applicable, included in the meta-analysis).                                                                                                                                                   | ✓                  |
| Data collection process            | 10 | Describe method of data extraction from reports (e.g., piloted forms, independently, in duplicate) and any processes for obtaining and confirming data from investigators.                                                                                                                                  | ✓                  |
| Data items                         | 11 | List and define all variables for which data were sought (e.g., PICOS, funding sources) and any assumptions and simplifications made.                                                                                                                                                                       | ✓                  |
| Risk of bias in individual studies | 12 | Describe methods used for assessing risk of bias of individual studies (including specification of whether this was done at the study or outcome level), and how this information is to be used in any data synthesis.                                                                                      | ✓                  |
| Summary measures                   | 13 | State the principal summary measures (e.g., risk ratio, difference in means).                                                                                                                                                                                                                               | ✓                  |
| Synthesis of results               | 14 | Describe the methods of handling data and combining results of studies, if done, including measures of consistency (e.g., I <sup>2</sup> ) for each meta-analysis. <a href="http://bmjopen.bmj.com/site/about/guidelines.xhtml">http://bmjopen.bmj.com/site/about/guidelines.xhtml</a>                      | ✓                  |

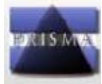

# PRISMA 2009 Checklist

Page 1 of 2

| Section/topic                 | #  | Checklist item                                                                                                                                                                                           | Reported on page # |
|-------------------------------|----|----------------------------------------------------------------------------------------------------------------------------------------------------------------------------------------------------------|--------------------|
| Risk of bias across studies   | 15 | Specify any assessment of risk of bias that may affect the cumulative evidence (e.g., publication bias, selective reporting within studies).                                                             | ✓                  |
| Additional analyses           | 16 | Describe methods of additional analyses (e.g., sensitivity or subgroup analyses, meta-regression), if done, indicating which were pre-specified.                                                         | ✓                  |
| <b>RESULTS</b>                |    |                                                                                                                                                                                                          |                    |
| Study selection               | 17 | Give numbers of studies screened, assessed for eligibility, and included in the review, with reasons for exclusions at each stage, ideally with a flow diagram.                                          | NA                 |
| Study characteristics         | 18 | For each study, present characteristics for which data were extracted (e.g., study size, PICOS, follow-up period) and provide the citations.                                                             | NA                 |
| Risk of bias within studies   | 19 | Present data on risk of bias of each study and, if available, any outcome level assessment (see item 12).                                                                                                | NA                 |
| Results of individual studies | 20 | For all outcomes considered (benefits or harms), present, for each study: (a) simple summary data for each intervention group (b) effect estimates and confidence intervals, ideally with a forest plot. | NA                 |
| Synthesis of results          | 21 | Present results of each meta-analysis done, including confidence intervals and measures of consistency.                                                                                                  | NA                 |
| Risk of bias across studies   | 22 | Present results of any assessment of risk of bias across studies (see Item 15).                                                                                                                          | NA                 |
| Additional analysis           | 23 | Give results of additional analyses, if done (e.g., sensitivity or subgroup analyses, meta-regression [see Item 16]).                                                                                    | NA                 |
| <b>DISCUSSION</b>             |    |                                                                                                                                                                                                          |                    |
| Summary of evidence           | 24 | Summarize the main findings including the strength of evidence for each main outcome; consider their relevance to key groups (e.g., healthcare providers, users, and policy makers).                     | NA                 |
| Limitations                   | 25 | Discuss limitations at study and outcome level (e.g., risk of bias), and at review-level (e.g., incomplete retrieval of identified research, reporting bias).                                            | NA                 |
| Conclusions                   | 26 | Provide a general interpretation of the results in the context of other evidence, and implications for future research.                                                                                  | NA                 |
| <b>FUNDING</b>                |    |                                                                                                                                                                                                          |                    |
| Funding                       | 27 | Describe sources of funding for the systematic review and other support (e.g., supply of data); role of funders for the systematic review.                                                               | NA                 |

From: Moher D, Liberati A, Tetzlaff J, Altman DG, The PRISMA Group (2009). Preferred Reporting Items for Systematic Reviews and Meta-Analyses: The PRISMA Statement. PLoS Med 6(7): e1000097. doi:10.1371/journal.pmed1000097

For more information, visit: [www.prisma-statement.org](http://www.prisma-statement.org).

# BMJ Open

## Deep Learning-Based Facial Image Analysis in Medical Research: A Systematic Review Protocol

|                                 |                                                                                                                                                                                                                                                                                                                                                                                                                                                                                                                                                                                                                                                                                                                                          |
|---------------------------------|------------------------------------------------------------------------------------------------------------------------------------------------------------------------------------------------------------------------------------------------------------------------------------------------------------------------------------------------------------------------------------------------------------------------------------------------------------------------------------------------------------------------------------------------------------------------------------------------------------------------------------------------------------------------------------------------------------------------------------------|
| Journal:                        | <i>BMJ Open</i>                                                                                                                                                                                                                                                                                                                                                                                                                                                                                                                                                                                                                                                                                                                          |
| Manuscript ID                   | bmjopen-2020-047549.R1                                                                                                                                                                                                                                                                                                                                                                                                                                                                                                                                                                                                                                                                                                                   |
| Article Type:                   | Protocol                                                                                                                                                                                                                                                                                                                                                                                                                                                                                                                                                                                                                                                                                                                                 |
| Date Submitted by the Author:   | 05-Aug-2021                                                                                                                                                                                                                                                                                                                                                                                                                                                                                                                                                                                                                                                                                                                              |
| Complete List of Authors:       | Su, Zhaohui; UT Health San Antonio, Center on Smart and Connected Health Technologies, Mays Cancer Center, School of Nursing<br>Liang, Bin; Chinese Academy of Medical Sciences and Peking Union Medical College<br>Shi, Feng; Shanghai United Imaging Intelligence<br>Gelfond, J; University of Texas Health Science Center at San Antonio, Epidemiology and Biostatistics<br>Šegalo, Sabina; University of Sarajevo<br>Wang, Jing; Florida State University, College of Nursing<br>Jia, Peng; University of Twente, Faculty of Geo-Information Science and Earth Observation (ITC); International Initiative on Spatial Lifecourse Epidemiology (ISLE),<br>Hao, Xiaoning; National Health Commission of the People's Republic of China |
| <b>Primary Subject Heading</b>: | Public health                                                                                                                                                                                                                                                                                                                                                                                                                                                                                                                                                                                                                                                                                                                            |
| Secondary Subject Heading:      | Health informatics, Public health, Diagnostics, Evidence based practice, Medical management                                                                                                                                                                                                                                                                                                                                                                                                                                                                                                                                                                                                                                              |
| Keywords:                       | PUBLIC HEALTH, Information technology < BIOTECHNOLOGY & BIOINFORMATICS, Health informatics < BIOTECHNOLOGY & BIOINFORMATICS, Telemedicine < BIOTECHNOLOGY & BIOINFORMATICS, BIOTECHNOLOGY & BIOINFORMATICS                                                                                                                                                                                                                                                                                                                                                                                                                                                                                                                               |
|                                 |                                                                                                                                                                                                                                                                                                                                                                                                                                                                                                                                                                                                                                                                                                                                          |

SCHOLARONE™  
Manuscripts

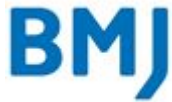

I, the Submitting Author has the right to grant and does grant on behalf of all authors of the Work (as defined in the below author licence), an exclusive licence and/or a non-exclusive licence for contributions from authors who are: i) UK Crown employees; ii) where BMJ has agreed a CC-BY licence shall apply, and/or iii) in accordance with the terms applicable for US Federal Government officers or employees acting as part of their official duties; on a worldwide, perpetual, irrevocable, royalty-free basis to BMJ Publishing Group Ltd ("BMJ") its licensees and where the relevant Journal is co-owned by BMJ to the co-owners of the Journal, to publish the Work in this journal and any other BMJ products and to exploit all rights, as set out in our [licence](#).

The Submitting Author accepts and understands that any supply made under these terms is made by BMJ to the Submitting Author unless you are acting as an employee on behalf of your employer or a postgraduate student of an affiliated institution which is paying any applicable article publishing charge ("APC") for Open Access articles. Where the Submitting Author wishes to make the Work available on an Open Access basis (and intends to pay the relevant APC), the terms of reuse of such Open Access shall be governed by a Creative Commons licence – details of these licences and which [Creative Commons](#) licence will apply to this Work are set out in our licence referred to above.

Other than as permitted in any relevant BMJ Author's Self Archiving Policies, I confirm this Work has not been accepted for publication elsewhere, is not being considered for publication elsewhere and does not duplicate material already published. I confirm all authors consent to publication of this Work and authorise the granting of this licence.

# Deep Learning-Based Facial Image Analysis in Medical Research: A Systematic Review Protocol

Zhaohui Su,<sup>1</sup> Bin Liang,<sup>2</sup> Feng Shi,<sup>3</sup> Jonathan Gelfond,<sup>4</sup> Sabina Šegalo,<sup>5</sup> Jing Wang,<sup>6</sup> Peng Jia,<sup>7</sup>  
Xiaoning Hao<sup>8\*</sup>

1. Ph.D., Center on Smart and Connected Health Technologies, Mays Cancer Center, School of Nursing, UT Health San Antonio, San Antonio, Texas, 78229, U.S.A.; szh@utexas.edu
2. Ph.D., M.D., Department of Radiation Oncology, National Cancer Center/National Clinical Research Center for Cancer/Cancer Hospital, Chinese Academy of Medical Sciences and Peking Union Medical College, Beijing, 10010, China; leangbin@gmail.com
3. Ph.D., Department of Research and Development, Shanghai United Imaging Intelligence Co., Ltd., Shanghai 200232, China; feng.shi@united-imaging.com
4. M.D., Ph.D., Associate Professor, Department of Population Health Sciences, UT Health San Antonio, San Antonio, Texas, 78229, U.S.A.; gelfondjal@uthscsa.edu
5. Ph.D., Department of Microbiology, Faculty of Medicine, University of Sarajevo, Sarajevo 71000, Bosnia & Herzegovina; sabina.segalo11@gmail.com
6. Ph.D., M.P.H., R.N., FAAN, Dean and Professor, College of Nursing, Florida State University, Tallahassee, Florida, 32306, U.S.A.; jwang19@fsu.edu
7. Ph.D., Department of Land Surveying and Geo-Informatics, The Hong Kong Polytechnic University, Hong Kong, China; International Institute of Spatial Lifecourse Epidemiology (ISLE), Hong Kong, China; jiapengff@hotmail.com
8. Ph.D., Professor, Director of Division, Division of Health Security Research, China National Health Development Research Center, National Health Commission, P.R. China; Beijing, 100044, China; haoxn@nhei.cn

\*Corresponding author: Xiaoning Hao, Ph.D., Professor, Director of Division, Division of Health Security Research, China National Health Development Research Center, National Health Commission, P.R. China; No. 9 Chegongzhuang Street, Xicheng District, 100044, China; haoxn@nhei.cn; (+86) 010-88385748

# Deep Learning-Based Facial Image Analysis in Medical Research: A Systematic Review Protocol

## Abstract

**Introduction:** Deep learning techniques are gaining momentum in medical research. Evidence shows that deep learning has advantages over humans in image identification and classification, such as facial image analysis in detecting people's medical conditions. While positive findings are available, little is known about the state-of-the-art of deep learning-based facial image analysis in the medical context. For the consideration of patients' welfare and the development of the practice, a timely understanding of the challenges and opportunities faced by research on deep-learning-based facial image analysis is needed. To address this gap, we aim to conduct a systematic review to identify the characteristics and effects of deep learning-based facial image analysis in medical research. Insights gained from this systematic review will provide a much-needed understanding of the characteristics, challenges, as well as opportunities in deep learning-based facial image analysis applied in the contexts of disease detection, diagnosis, and prognosis.

**Methods:** Databases including PubMed, PsycINFO, CINAHL, IEEEExplore, and Scopus will be searched for relevant studies published in English in September, 2021. Titles, abstracts, and full-text articles will be screened to identify eligible articles. A manual search of the reference lists of the included articles will also be conducted. The Preferred Reporting Items for Systematic Reviews and Meta-Analyses (PRISMA) framework was adopted to guide the systematic review process. Two reviewers will independently examine the citations and select studies for inclusion. Discrepancies will be resolved by group discussions till a consensus is reached. Data will be extracted based on the research objective and selection criteria adopted in this study.

**Ethics and dissemination:** As the study is a protocol for a systematic review, ethical approval is not required. The study findings will be disseminated via peer-reviewed publications and conference presentations.

**Study Protocol Registration:** PROSPERO [CRD42020196473](https://www.crd.york.ac.uk/PROSPERO/record/CRD42020196473)

**Keywords:** facial image analysis; artificial intelligence; deep learning; convolutional neural network; abnormal facial expressions; facial analysis



## Strengths and limitations of this study

- This systematic review protocol follows the Preferred Reporting Items for Systematic Review and Meta- Analysis Protocols guidelines.
- By examining the characteristics and effects of deep learning-based facial image analysis in medical research, this systematic review bridges the gap in the literature.
- This review is limited to evidence on the use and application of deep learning technologies in patients' facial image identification and classification.
- Non-English databases will not be searched, which might limit the representativeness of the results.

# Deep Learning-Based Facial Image Analysis in Medical Research: A Systematic Review Protocol

## Background

As disease manifestations often show in various places in the human body, such as Down Syndromes can change patients' facial features, researchers have been investigating whether analyzing appearance features can facilitate early disease detection and identification [1-5]. One promising field is deep learning-based facial analysis [6-8]. Deep learning represents a powerful range of artificial intelligence (AI) algorithm that allows computers to tackle complex problems via capitalizing on neural networks, such as convolutional neural networks (CNNs), that are rich in neurons, layers, and interconnectivity (see Figure 1) [9]. Simply put, deep learning is a mechanism that allows computers to solve complex problems by neural network architecture. This ability to develop complex network structures gives deep learning a distinctive advantage: it can automatically transform raw data input into meaningful features that enable pattern identification [10]. Deep learning technique has revolutionary potential in practical and research fields [11]. In practice, as deep learning effectively identifies objects, traffic signs, and faces, its adaptations have been widely applied in designing robots and self-driving cars [12-15]. Deep learning has also been widely adopted in biomedical and clinical research, particularly in the field of medical imaging [16-19].

---Insert Figure 1 here---

Medical conditions are often diagnosed by means of tests, such as biopsy and diagnostic imaging. An example list of diseases that have been analyzed by deep learning technologies

1  
2  
3 could be found in Table 1. As diagnostic imaging is noninvasive and can facilitate personalized  
4 medicine, it is a preferred test option for patients and healthcare practitioners [20, 21]. This, in  
5  
6 turn, has contributed to the exponential growth of medical imaging data and the increasing need  
7  
8 for boosting medical image processing power to formulate diagnosis swiftly [21, 22]. Compared  
9  
10 to traditional computer aided diagnosis for analyzing medical imaging, such as hand-crafted  
11  
12 radiomics for tumor detection, deep learning methods are superior in their ability to process large  
13  
14 quantities of medical images accurately and cost-effectively, without exerting a heavy workload  
15  
16 on radiologists [23-27]. Evidence shows that deep learning-based medical image analysis was  
17  
18 able to increase accuracy rates in various disease contexts, such as the identification of spinal  
19  
20 disorder [1] and lung cancer histology [28], classification of skin lesion [29] and chronic gastritis  
21  
22 [30], and the prediction of tumor-related genes [31] and vascular diseases [32].  
23  
24  
25  
26  
27  
28  
29  
30

31 ---Insert Table 1 here---  
32  
33  
34

35 Applying the deep learning technique to perform facial recognition and analysis tasks,  
36  
37 researchers found that the technique yielded superior results in identifying and classifying faces  
38  
39 of people with cancer from those without [6]. Similarly, examining facial phenotypes of people  
40  
41 with genetic disorders, findings indicate that the technique was effective and was able to yield an  
42  
43 optimal 91% top-10 accuracy [33]. Evidence further indicates that, for some tasks involving  
44  
45 identifying and classifying facial images, deep learning techniques have often performed on par  
46  
47 or better than human beings [5, 7, 10, 34-36]. Comparing clinical and deep learning evaluations  
48  
49 of microdeletion syndrome facial phenotypes, researchers found that deep learning outperformed  
50  
51 clinical evaluations in terms of sensitivity and specificity by 96% [35]. These findings combined  
52  
53  
54  
55  
56  
57  
58  
59  
60

1  
2  
3 suggest that deep learning-based facial analysis technology has great potential to address  
4  
5 complex medical challenges prevalent in healthcare. However, there have not been any  
6  
7 systematic review on the state-of-the-art applications of deep learning-based facial analysis in  
8  
9 non-invasively evaluating medical conditions. Therefore, to bridge this gap, we aim to  
10  
11 systematically review the literature and identify the characteristics and effects of deep learning-  
12  
13 based facial analysis techniques applied in medical research.  
14  
15  
16  
17  
18

## 19 **Methods and analysis**

20  
21  
22 This systematic review was registered with the International Prospective Register of  
23  
24 Systematic Reviews database or PROSPERO ([CRD42020196473](https://doi.org/10.1111/1744-4789.12547)) *a priori* to improve research  
25  
26 rigor [37, 38]. The Principles of the Preferred Reporting Items for Meta-Analysis protocol  
27  
28 (PRISMA) was adopted to guide this systematic review [39]. Our search strategy incorporated  
29  
30 medical subject heading (MeSH) and keyword terms for the concept of deep learning and facial  
31  
32 analysis. The search strategy was developed in consultation with an academic librarian, and  
33  
34 subsequently will be deployed to target databases, including PubMed, PsycINFO, CINAHL,  
35  
36 IEEEXplore, and Scopus (Table 2). The search will be initiated in September, 2021. Studies will  
37  
38 be limited to journal articles published in English. We will adopt two additional search  
39  
40 mechanisms to locate eligible articles: (1) a manual search of the reference list of the included  
41  
42 articles will be performed, and (2) a reverse search of papers that cited articles included in the  
43  
44 final review via Google Scholar. An academic librarian will facilitate the search process, helping  
45  
46 administer the search and download the citation records to Rayyan (<http://rayyan.qcri.org>).  
47  
48  
49  
50  
51  
52  
53

54 ---Insert Table 2 here---

## Inclusion and exclusion criteria

The inclusion criteria were developed *a priori* and listed in Table 3. Studies will be excluded articles if they 1) did not report findings on human beings (e.g., studies on mice), 2) did not focus on full facial features (e.g., research on retina or lip-cleft), 3) did not conduct research in a medical context (e.g., in the context of criminology), and 4) did not report empirical findings (e.g., editorial or comment papers).

---Insert Table 3 here---

## Risk of bias assessment

To ensure quality of included studies, a risk of bias assessment will be conducted independently by two reviewers, using the Cochrane Collaboration evaluation framework [40]. The framework has seven domains: (1) random sequence generation, (2) allocation concealment, (3) blinding of participants and personnel, (4) blinding of outcome assessment, (5) incomplete outcome data, (6) selective reporting, and (7) any other source of bias. The risk of bias will be evaluated independently by two reviewers. Potential discrepancies regarding the risk of bias will be resolved via group discussions till a consensus is reached.

## Data Extraction

Two reviewers will independently examine the citations and select studies for inclusion. Discrepancies will be resolved by group discussions till a consensus is reached. Data will be extracted based on the research objective and selection criteria adopted in this study. For articles

1  
2  
3 that meet the inclusion criteria, the reviewers will extract the following information from the  
4 included papers: research objective /questions, disease context, sample characteristics (e.g.,  
5 characteristics of facial records), AI characteristics (e.g., algorithm adopted), and empirical  
6 findings.  
7  
8  
9  
10  
11  
12  
13

### 14 **Data synthesis and analysis**

15  
16 If eligible studies share enough similarities to be pooled, a meta-analysis will be  
17 conducted to gain further insights into the data. Main clinical, methodological, as well as  
18 statistical differences will be carefully considered to determine the heterogeneity of the eligible  
19 studies. If eligible studies are found heterogeneous, a narrative synthesis will be conducted to  
20 summarize the data. A summary of the data extracted will be organized to synthesize key results.  
21 Both tables and graphs will be used to represent the key characteristics of eligible articles.  
22 Descriptive analysis will be performed on categorical variables. In this review, we will undertake  
23 a narrative approach to synthesize data. In other words, in addition to shedding light on key  
24 information like the sensitivity, specificity, overall accuracy of the deep learning technologies in  
25 analyzing facial images (as opposed to clinicians' analyses), we will also provide detailed  
26 analysis of the disease contexts and the techniques applied to chart the state-of-the-art of deep  
27 learning technologies in facial image analyses.  
28  
29  
30  
31  
32  
33  
34  
35  
36  
37  
38  
39  
40  
41  
42  
43  
44  
45  
46

### 47 **Ethics and dissemination**

48  
49 As the study is a protocol for a systematic review, ethical approval is not required. The  
50 study findings will be disseminated via peer-reviewed publications and conference presentations.  
51  
52  
53  
54  
55  
56  
57  
58  
59  
60

## Patient and Public Involvement

The nature of the study, which is a review and analysis of previously published data, dictates that there is limited to no meaningful need for patient and public involvement in the design, delivery, or dissemination of the research findings.

## Discussion

Though a growing body of research has applied deep learning-based facial image analysis in the medical context for disease detection, diagnosis, and prognosis, to date, no systematic review has investigated the state-of-the-art application of deep learning-based facial image analysis recognition in addressing medical diagnoses and clinical states. Therefore, to bridge this gap, we aim to systematically review the literature and present the characteristics, challenges, as well as opportunities in deep learning-based facial analysis techniques applied in medical research. To better organize the research findings, we developed a framework that illustrates the main causes for abnormal facial expressions in patients. It is important to note that we are identifying medical states and conditions and not individuals.

After reviewing the literature [41-56], we identified the following four preliminary categories of causes for short-term or long-term abnormal facial expressions in people: (1) gene-related factors, (2) neurological factors, (3) psychiatric conditions, and (4) medication-induced triggers. Genetic-related factors, such as the presence or mutation of a certain gene, are the most studied cause for abnormal facial changes in individuals [5, 7, 35]. Down syndrome, which is affected by the presence of a third copy of chromosome 21, is an example of genetic-related factors that can cause individuals' abnormal facial changes [5]. Neurological factors can also cause individuals' facial phenotypes. Stroke or transient ischemic attack is an example of

1  
2  
3 neurological factors, which can occur either prior to or after the onset of the disease [57, 58]. The  
4  
5 third cause for abnormal facial changes centers on individuals' psychiatric conditions or mental  
6  
7 illnesses, especially psychotic disorders such as the Tourette syndrome (facial tics). Last but not  
8  
9 the least, medication-induced triggers, such as the Neuroleptic malignant syndrome (caused by  
10  
11 antipsychotic medications), can also cause abnormal facial changes in people. Details of this  
12  
13 framework can be found in Table 4. This framework will be used in the planned systematic  
14  
15 review study to guide the data extraction process.  
16  
17  
18  
19  
20  
21

22 ---Insert Table 4 here---

23  
24  
25  
26 Overall, insights gained from this study will be able to provide a much-needed  
27  
28 understanding of the characteristics, challenges, as well as opportunities in the context of deep  
29  
30 learning-based facial image analysis technologies applied in disease detection, diagnosis, and  
31  
32 prognosis. In addition to gaining a connected and comprehensive understanding of the current  
33  
34 application of facial image analysis, results of the study will also be able to shed light on  
35  
36 whether, similar to facial recognition used in non-medical [59, 60] and medical contexts [61, 62],  
37  
38 whether or to what degree is systematic bias is present in the application of deep learning  
39  
40 technologies for facial image analysis. A biased and inaccurate facial image analysis system will  
41  
42 not only exert unwarranted, though avoidable, disparities on patients (e.g., gender inequality)  
43  
44 [61], it will also alienate the patients from the much-needed deep-learning-assisted medical  
45  
46 opportunities their health and wellbeing can benefit from [63]. Therefore, for the consideration  
47  
48 of patients' welfare and the development of the clinical practice, a timely understanding of the  
49  
50  
51  
52  
53  
54  
55  
56  
57  
58  
59  
60



1  
2  
3 scope of the research literature as well as the challenges and opportunities faced by research on  
4  
5 deep-learning-based facial image analysis is much needed.  
6  
7  
8  
9  
10  
11  
12  
13  
14  
15  
16  
17  
18  
19  
20  
21  
22  
23  
24  
25  
26  
27  
28  
29  
30  
31  
32  
33  
34  
35  
36  
37  
38  
39  
40  
41  
42  
43  
44  
45  
46  
47  
48  
49  
50  
51  
52  
53  
54  
55  
56  
57  
58  
59  
60

For peer review only

## Abbreviations

AI: Artificial intelligence

## Ethics and dissemination

- Not applicable.

## Authors' contributions

- ZS developed the research idea and drafted the manuscript. BL, FS, JG, SS, JW, PJ, & XH reviewed and revised the manuscript.

## Funding statement

- None.

## Competing interests

- None.

## Acknowledgements

- The authors wish to thank Emme Lopez, for her assistance in the search strategy development. Furthermore, the authors are very grateful for the constructive input offered by the editors and reviewers.

## References:

1. Yang, J., et al., *Development and validation of deep learning algorithms for scoliosis screening using back images*. Communications Biology, 2019. **2**(1): p. 390.
2. Wang, X., et al., *Artificial intelligence in tongue diagnosis: Using deep convolutional neural network for recognizing unhealthy tongue with tooth-mark*. Computational and structural biotechnology journal, 2020. **18**: p. 973-980.
3. Lam, C., et al., *Automated detection of diabetic retinopathy using deep learning*. AMIA Joint Summits on Translational Science proceedings. AMIA Joint Summits on Translational Science, 2018. **2017**: p. 147-155.
4. Martin, D., et al., *Systematic review and meta-analysis of the relationship between genetic risk for schizophrenia and facial emotion recognition*. Schizophrenia Research, 2020.
5. Kruszka, P., et al., *Down syndrome in diverse populations*. American Journal of Medical Genetics Part A, 2017. **173**(1): p. 42-53.
6. Liang, B., et al., *Identification of the facial features of patients with cancer: A deep learning-based pilot study*. J Med Internet Res, 2020. **22**(4): p. e17234.
7. Latorre-Pellicer, A., et al., *Evaluating Face2Gene as a tool to identify Cornelia de Lange syndrome by facial phenotypes*. International Journal of Molecular Sciences, 2020. **21**(3).
8. Myers, L., et al., *Clinical versus automated assessments of morphological variants in twins with and without neurodevelopmental disorders*. American Journal of Medical Genetics Part A, 2020. **182**(5): p. 1177-1189.
9. Deng, L. and D. Yu, *Deep learning: Methods and applications*. Foundations and Trends in Signal Processing, 2014. **7**(3-4): p. 197-387.
10. LeCun, Y., Y. Bengio, and G. Hinton, *Deep learning*. Nature, 2015. **521**(7553): p. 436-444.
11. Gilani, S.Z. and A. Mian. *Learning from millions of 3D scans for large-scale 3D face recognition*. in *2018 IEEE/CVF Conference on Computer Vision and Pattern Recognition*. 2018.
12. Algabri, R. and M.-T. Choi, *Deep-learning-based indoor human following of mobile robot using color feature*. Sensors, 2020. **20**(9).
13. Yin, J., et al., *Table cleaning task by human support robot using deep learning technique*. Sensors (Basel, Switzerland), 2020. **20**(6): p. 1698.
14. Balado, J., et al., *Road environment semantic segmentation with deep learning from MLS point cloud data*. Sensors, 2019. **19**(16): p. 3466.
15. Naqvi, R.A., et al., *Deep learning-based gaze detection system for automobile drivers using a NIR camera sensor*. Sensors (Basel, Switzerland), 2018. **18**(2): p. 456.
16. Liu, G., et al., *Automatic classification of esophageal lesions in endoscopic images using a convolutional neural network*. Annals of translational medicine, 2020. **8**(7): p. 486-486.
17. Chartrand, G., et al., *Deep learning: A primer for radiologists*. RadioGraphics, 2017. **37**(7): p. 2113-2131.
18. Jeong, Y., et al., *Deep learning-based decision support system for the diagnosis of neoplastic gallbladder polyps on ultrasonography: Preliminary results*. Scientific Reports, 2020. **10**(1): p. 7700.
19. Sánchez Fernández, I., et al., *Deep learning in rare disease. Detection of tubers in tuberous sclerosis complex*. PLoS ONE, 2020. **15**(4): p. e0232376-e0232376.

20. Marro, A., T. Bandukwala, and W. Mak, *Three-dimensional printing and medical imaging: A review of the methods and applications*. *Current Problems in Diagnostic Radiology*, 2016. **45**(1): p. 2-9.
21. Atutornu, J. and C.M. Hayre, *Personalised medicine and medical imaging: Opportunities and challenges for contemporary health care*. *Journal of Medical Imaging and Radiation Sciences*, 2018. **49**(4): p. 352-359.
22. Afshar, P., et al., *From handcrafted to deep-learning-based cancer radiomics: Challenges and opportunities*. *IEEE Signal Processing Magazine*, 2019. **36**(4): p. 132-160.
23. Antropova, N., B.Q. Huynh, and M.L. Giger, *A deep feature fusion methodology for breast cancer diagnosis demonstrated on three imaging modality datasets*. *Medical Physics*, 2017. **44**(10): p. 5162-5171.
24. Giger, M.L., *Machine learning in medical imaging*. *Journal of the American College of Radiology*, 2018. **15**(3, Part B): p. 512-520.
25. Sahiner, B., et al., *Deep learning in medical imaging and radiation therapy*. *Medical Physics*, 2019. **46**(1): p. e1-e36.
26. Huang, S., et al., *Artificial intelligence in cancer diagnosis and prognosis: Opportunities and challenges*. *Cancer Letters*, 2020. **471**: p. 61-71.
27. Litjens, G., et al., *Deep learning as a tool for increased accuracy and efficiency of histopathological diagnosis*. *Scientific Reports*, 2016. **6**(1): p. 26286.
28. Moitra, D. and R.K. Mandal, *Prediction of non-small cell lung cancer histology by a deep ensemble of convolutional and bidirectional recurrent neural network*. *Journal of Digital Imaging*, 2020.
29. Mahbod, A., et al., *Transfer learning using a multi-scale and multi-network ensemble for skin lesion classification*. *Computer Methods and Programs in Biomedicine*, 2020. **193**: p. 105475.
30. Li, Z., et al., *Chronic gastritis classification using gastric X-ray images with a semi-supervised learning method based on tri-training*. *Medical & Biological Engineering & Computing*, 2020. **58**(6): p. 1239-1250.
31. Liu, S., et al., *Isocitrate dehydrogenase (IDH) status prediction in histopathology images of gliomas using deep learning*. *Scientific reports*, 2020. **10**(1): p. 7733-7733.
32. Kim, Y.D., et al., *Effects of hypertension, diabetes, and smoking on age and sex prediction from retinal fundus images*. *Scientific Reports*, 2020. **10**(1): p. 4623.
33. Gurovich, Y., et al., *Identifying facial phenotypes of genetic disorders using deep learning*. *Nature Medicine*, 2019. **25**(1): p. 60-64.
34. Wang, Y. and M. Kosinski, *Deep neural networks are more accurate than humans at detecting sexual orientation from facial images*. *Journal of Personality and Social Psychology*, 2018. **114**(2): p. 246-257.
35. Kruszka, P., et al., *22q11.2 deletion syndrome in diverse populations*. *American journal of medical genetics. Part A*, 2017. **173**(4): p. 879-888.
36. Elmas, M. and B. Gogus, *Success of face analysis technology in rare genetic diseases diagnosed by whole-exome sequencing: A single-center experience*. *Molecular Syndromology*, 2020. **11**(1): p. 4-14.
37. Xu, C., et al., *Protocol registration or development may benefit the design, conduct and reporting of dose-response meta-analysis: Empirical evidence from a literature survey*. *BMC Medical Research Methodology*, 2019. **19**(1): p. 78.

- 1  
2  
3 38. dos Santos, M.B.F., et al., *Protocol registration improves reporting quality of systematic*  
4 *reviews in dentistry*. BMC Medical Research Methodology, 2020. **20**(1): p. 57.  
5 39. Moher, D., et al., *Preferred reporting items for systematic review and meta-analysis*  
6 *protocols (PRISMA-P) 2015 statement*. Systematic Reviews, 2015. **4**(1): p. 1-1.  
7 40. Higgins, J.P., et al., *Cochrane handbook for systematic reviews of interventions*. 2019:  
8 John Wiley & Sons.  
9 41. Kruszka, P., et al., *Down syndrome in diverse populations*. Am J Med Genet A, 2017.  
10 **173**(1): p. 42-53.  
11 42. Basel-Vanagaite, L., et al., *Recognition of the Cornelia de Lange syndrome phenotype*  
12 *with facial dysmorphology novel analysis*. Clinical Genetics, 2016. **89**(5): p. 557-563.  
13 43. Cha, S., et al., *Identification of five novel genetic loci related to facial morphology by*  
14 *genome-wide association studies*. BMC Genomics, 2018. **19**(1): p. 481.  
15 44. Richmond, S., et al., *Facial genetics: A brief overview*. Frontiers in Genetics, 2018.  
16 **9**(462).  
17 45. Spencer, C.R. and R.M. Irving, *Causes and management of facial nerve palsy*. British  
18 Journal of Hospital Medicine, 2016. **77**(12): p. 686-691.  
19 46. Fasano, A. and M. Tinazzi, *Functional facial and tongue movement disorders*, in  
20 *Handbook of Clinical Neurology*, M. Hallett, J. Stone, and A. Carson, Editors. 2016,  
21 Elsevier. p. 353-365.  
22 47. Hagberg, B., *Clinical manifestations and stages of rett syndrome*. Mental Retardation and  
23 Developmental Disabilities Research Reviews, 2002. **8**(2): p. 61-65.  
24 48. Tan, N.C., L.L. Chan, and E.K. Tan, *Hemifacial spasm and involuntary facial*  
25 *movements*. QJM: An International Journal of Medicine, 2002. **95**(8): p. 493-500.  
26 49. Liu, T.-L., et al., *Association between facial emotion recognition and bullying*  
27 *involvement among adolescents with high-functioning autism spectrum disorder*.  
28 International Journal of Environmental Research and Public Health, 2019. **16**(24): p.  
29 5125.  
30 50. Boutrus, M., et al., *Increased facial asymmetry in autism spectrum conditions is*  
31 *associated with symptom presentation*. Autism Research, 2019. **12**(12): p. 1774-1783.  
32 51. Gill, C.E. and K. Kompolti, *Clinical Features of Tourette Syndrome*. Journal of Child  
33 Neurology, 2019. **35**(2): p. 166-174.  
34 52. Kim, D.D., et al., *Antipsychotic-associated symptoms of Tourette syndrome: A systematic*  
35 *review*. CNS Drugs, 2018. **32**(10): p. 917-938.  
36 53. Thomas, C.S., *A study of facial dysmorphophobia*. Psychiatric Bulletin, 1995. **19**(12): p.  
37 736-739.  
38 54. Phillips, K.A., T.F. Cash, and L. Smolak, *Body image and body dysmorphic disorder*.  
39 *Eating Disorders and Obesity: A Comprehensive Handbook*, 2002. **2**: p. 115.  
40 55. Reese, H.E., R.J. McNally, and S. Wilhelm, *Facial asymmetry detection in patients with*  
41 *body dysmorphic disorder*. Behaviour Research and Therapy, 2010. **48**(9): p. 936-940.  
42 56. White, Janson J., et al., *DVL3 alleles resulting in a -1 frameshift of the last exon mediate*  
43 *autosomal-dominant Robinow syndrome*. The American Journal of Human Genetics,  
44 2016. **98**(3): p. 553-561.  
45 57. Onder, H., L. Albayrak, and H. Polat, *Frontal lobe ischemic stroke presenting with*  
46 *peripheral type facial palsy: A crucial diagnostic challenge in emergency practice*.  
47 Turkish Journal of Emergency Medicine, 2017. **17**(3): p. 112-114.  
48  
49  
50  
51  
52  
53  
54  
55  
56  
57  
58  
59  
60

- 1  
2  
3 58. Han, Y.-y., et al., *Limb-shaking transient ischemic attack with facial muscles involuntary twitch successfully treated with internal carotid artery stenting*. *Brain and Behavior*, 2020. **n/a**(n/a): p. e01679.
- 4  
5  
6  
7 59. Buolamwini, J. and T. Gebru, *Gender shades: Intersectional accuracy disparities in commercial gender classification*, in *Proceedings of the 1st Conference on Fairness, Accountability and Transparency*, A.F. Sorelle and W. Christo, Editors. 2018, PMLR: Proceedings of Machine Learning Research. p. 77--91.
- 8  
9  
10  
11 60. Drozdowski, P., et al., *Demographic bias in biometrics: A survey on an emerging challenge*. *IEEE Transactions on Technology and Society*, 2020. **1**(2): p. 89-103.
- 12  
13  
14 61. Parikh, R.B., S. Teeple, and A.S. Navathe, *Addressing bias in artificial intelligence in health care*. *JAMA*, 2019. **322**(24): p. 2377-2378.
- 15  
16 62. Obermeyer, Z., et al., *Dissecting racial bias in an algorithm used to manage the health of populations*. *Science*, 2019. **366**(6464): p. 447.
- 17  
18 63. Garcia, R.V., et al. *The harms of demographic bias in feep face recognition research*. in *2019 International Conference on Biometrics (ICB)*. 2019.
- 19  
20  
21 64. Kong, X., et al., *Automatic detection of acromegaly from facial photographs using machine learning methods*. *EBioMedicine*, 2018. **27**: p. 94-102.
- 22  
23 65. Liang, B., et al., *Identification of the facial features of patients with cancer: A deep learning-based pilot study*. *J Med Internet Res*, 2020. **22**(4): p. e17234.
- 24  
25 66. Latorre-Pellicer, A., et al., *Evaluating Face2Gene as a tool to identify Cornelia de Lange syndrome by facial phenotypes*. *Int J Mol Sci*, 2020. **21**(3).
- 26  
27 67. Lin, S., et al., *Feasibility of using deep learning to detect coronary artery disease based on facial photo*. *Eur Heart J*, 2020. **41**(46): p. 4400-4411.
- 28  
29 68. Zhao, Q., et al., *Digital facial dysmorphology for genetic screening: Hierarchical constrained local model using ICA*. *Med Image Anal*, 2014. **18**(5): p. 699-710.
- 30  
31 69. Goceri, E., *Deep learning based classification of facial dermatological disorders*. *Computers in Biology and Medicine*, 2021. **128**: p. 104118.
- 32  
33 70. Han, S.S., et al., *Keratinocytic skin cancer detection on the face using region-based convolutional neural network*. *JAMA Dermatology*, 2020. **156**(1): p. 29-37.
- 34  
35  
36 71. Camino, A., et al., *Deep learning for the segmentation of preserved photoreceptors on en face optical coherence tomography in two inherited retinal diseases*. *Biomed Opt Express*, 2018. **9**(7): p. 3092-3105.
- 37  
38  
39 72. Bargshady, G., et al., *Enhanced deep learning algorithm development to detect pain intensity from facial expression images*. *Expert Systems with Applications*, 2020. **149**: p. 113305.
- 40  
41  
42  
43 73. Yolcu, G., et al. *Deep learning-based facial expression recognition for monitoring neurological disorders*. in *2017 IEEE International Conference on Bioinformatics and Biomedicine (BIBM)*. 2017.
- 44  
45  
46  
47  
48  
49  
50  
51  
52  
53  
54  
55  
56  
57  
58  
59  
60

**Table 1.** An example list of diseases that have been analyzed by deep learning techniques

| Disease context                 | Deep Learning Technique                                                                                                                             |
|---------------------------------|-----------------------------------------------------------------------------------------------------------------------------------------------------|
| Acromegaly                      | Convolutional Neural Network (along with Generalized Linear Models; K-nearest neighbors; Support Vector Machines; forests of randomized trees) [64] |
| Cancer                          | Convolutional neural network [65]                                                                                                                   |
| Cornelia de Lange syndrome      | DeepGestalt technology [66]                                                                                                                         |
| Coronary artery disease         | Convolutional neural network [67]                                                                                                                   |
| Down syndrome                   | Independent component analysis [68]                                                                                                                 |
| Facial dermatological disorders | Convolutional neural network [69]                                                                                                                   |
| Keratinocytic Skin Cancer       | Convolutional neural network [70]                                                                                                                   |
| Inherited retinal degenerations | Convolutional neural network [71]                                                                                                                   |
| Noonan syndrome                 | DeepGestalt technology [33]                                                                                                                         |
| Pain intensity                  | Convolutional neural network [72]                                                                                                                   |
| Neurological disorders          | Convolutional neural network [73]                                                                                                                   |

**Table 2.** Example PubMed search strategy

| Concept               | Search string                                                                                                                                                                                                                                                                                                                                                                                        |
|-----------------------|------------------------------------------------------------------------------------------------------------------------------------------------------------------------------------------------------------------------------------------------------------------------------------------------------------------------------------------------------------------------------------------------------|
| Deep learning         | “deep learning”[MeSH] OR “deep learning”[TIAB] OR “artificial intelligence” [MeSH] OR “artificial intelligence” [TIAB] OR “machine learning”[MeSH] OR “machine learning”[TIAB] OR “convolutional neural network”[MeSH] OR “convolutional neural network”[TIAB] OR “convolutional neural networks”[TIAB]                                                                                              |
| Facial image analysis | “face detect*” OR “facial detect*” OR “face recogn*” OR “facial recogn*” OR “face extract*” or “facial extract*” OR “face analys*” OR “facial analys*” OR “face dysmorphology” OR “facial dysmorphology” OR “face phenotype*” OR “facial phenotype*” OR “face feature*” OR “facial feature*” OR “face2gene” OR “gestalt theory” OR “face photograph*” OR “facial photograph*” OR “facial expression” |



**Table 3.** Study inclusion criteria

| <b>Data type</b>     | <b>Inclusion criteria</b>                                                                                                                                                                      |
|----------------------|------------------------------------------------------------------------------------------------------------------------------------------------------------------------------------------------|
| Participants         | Individuals younger or older than 18 years old                                                                                                                                                 |
| Research context     | Medical research or healthcare                                                                                                                                                                 |
| Analytical technique | Deep learning algorithms-based facial image analysis                                                                                                                                           |
| Language             | English                                                                                                                                                                                        |
| Study type           | Quantitative empirical study                                                                                                                                                                   |
| Outcome              | Report empirical and original findings on the application of deep learning-based facial image analysis in medical context (e.g., accuracy of facial image analysis in detecting Down syndrome) |

**Table 4.** Main causes for abnormal facial expressions

| Cause                       | Definition and Example                                                                                                                                                                                                                                                                                                                                                                                                                                                                                                                                                                                                                                                                 |
|-----------------------------|----------------------------------------------------------------------------------------------------------------------------------------------------------------------------------------------------------------------------------------------------------------------------------------------------------------------------------------------------------------------------------------------------------------------------------------------------------------------------------------------------------------------------------------------------------------------------------------------------------------------------------------------------------------------------------------|
| Gene-related factors        | <p>Gene-related factors are causes for individuals' abnormal facial changes that root in the presence or mutation of one or a set of genes.</p> <p><b>Examples:</b> Down syndrome (genetic root: presence of a third copy of chromosome 21) or Cornelia de Lange syndrome (genetic root: NIPBL or <i>SMCIA</i>, <i>SMC3</i>, <i>RAD21</i> or <i>HDAC8</i>, <i>BRD4</i> and <i>ANKRD11</i> genes) [41-43, 56].</p>                                                                                                                                                                                                                                                                      |
| Neurological factors        | <p>Neurological factors are defined as reasons that are associated with individuals' congenital or acquired disorders of nerves and the nervous system. Neurological factors can either be related to genetic or non-genetic factors, caused by irregularity in nerves associated with the brain or the face.</p> <p><b>Examples:</b> Neurological factors with genetic causes (e.g., Rett syndrome, <i>MECP2</i> gene; Cervical or Cranial dystonia, <i>GNAL</i> gene) and without (e.g., embouchure dystonia, Oromandibular dystonia) [47, 48]; due to nerves associated with the brain (e.g., stroke) or the face (Bell's palsy or facial paralysis, Hemifacial Spasm) [44-46].</p> |
| Psychiatric conditions      | <p>Psychiatric conditions, especially psychotic disorders, have the potential to cause abnormal facial expressions among individuals. Psychiatric conditions could be broadly defined as mental illnesses, whereas psychotic disorder factors are causes to abnormal facial expressions that root in individuals' impaired sense of reality.</p> <p><b>Examples:</b> Non-drug-related Tourette syndrome (facial tics) or Autism (facial expression limitation) [49-51].</p>                                                                                                                                                                                                            |
| Medication-induced triggers | <p>Medication-induced triggers could be understood as causes to individuals' short-term or long-term abnormal facial changes due to their adverse reactions to a certain medication of a type of medications.</p> <p><b>Examples:</b> Neuroleptic malignant syndrome (antipsychotic drugs), Tardive dyskinesia (antipsychotic medications), or drug-related Tourette syndrome [52-55].</p>                                                                                                                                                                                                                                                                                             |

1  
2  
3 **Figure 1.** Relationship between artificial intelligence, machine learning, deep learning, and  
4 convolutional neural networks.  
5  
6

7  
8 **\*Please refer to the supplementary materials section for the figure\***  
9  
10  
11  
12  
13  
14  
15  
16  
17  
18  
19  
20  
21  
22  
23  
24  
25  
26  
27  
28  
29  
30  
31  
32  
33  
34  
35  
36  
37  
38  
39  
40  
41  
42  
43  
44  
45  
46  
47  
48  
49  
50  
51  
52  
53  
54  
55  
56  
57  
58  
59  
60

For peer review only

1  
2  
3  
4  
5  
6  
7  
8  
9  
10  
11  
12  
13  
14  
15  
16  
17  
18  
19  
20  
21  
22  
23  
24  
25  
26  
27  
28  
29  
30  
31  
32  
33  
34  
35  
36  
37  
38  
39  
40  
41  
42  
43  
44  
45  
46  
47  
48  
49  
50  
51  
52  
53  
54  
55  
56  
57  
58  
59  
60

**Figure 1.** Relationship between artificial intelligence, machine learning, deep learning, and convolutional neural networks.

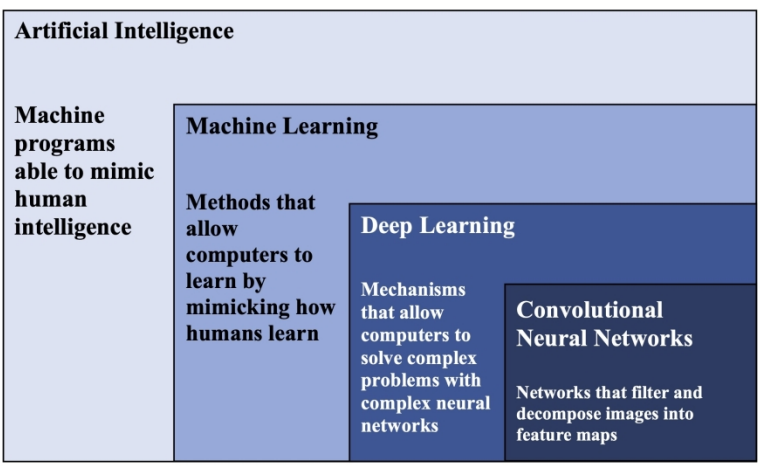

Figure 1. Relationship between artificial intelligence, machine learning, deep learning, and convolutional neural networks.

899x1164mm (72 x 72 DPI)
